# Supplementary material for: Comparative Analysis of Growth and Physiological Responses of Sugarcane Elite Genotypes to Water Stress and Sandy Loam Soils
Source: MDPI journal article supplement (doi:10.3390/plants12152759), 2023-07-25
Supplement: s1 [file s1]

**Table.** Soil profile analysis of 2020-21 and 2021-22.

| Soil<br>Texture | 2020-21 |                   |       |      |     |      |                 |                      |                   |                   |                   |
|-----------------|---------|-------------------|-------|------|-----|------|-----------------|----------------------|-------------------|-------------------|-------------------|
|                 | pH      | EC                | N     | P    | K   | O.M  | Saturation<br>% | Moisture<br>contents | Ca+Mg             | Na <sup>+</sup>   | Cl <sup>-</sup>   |
|                 |         | dSm <sup>-2</sup> | %     | ppm  | ppm | %    | %               | %                    | meL <sup>-1</sup> | meL <sup>-1</sup> | meL <sup>-1</sup> |
| Sandy<br>loam   | 7.5     | 1.95              | 0.344 | 0.85 | 39  | 0.07 | 17              | 22                   | 15                | 4.5               | 4                 |
|                 | 7.6     | 1.86              | 0.36  | 0.89 | 36  | 0.06 | 16              | 21                   | 16.1              | 4.87              | 4.1               |

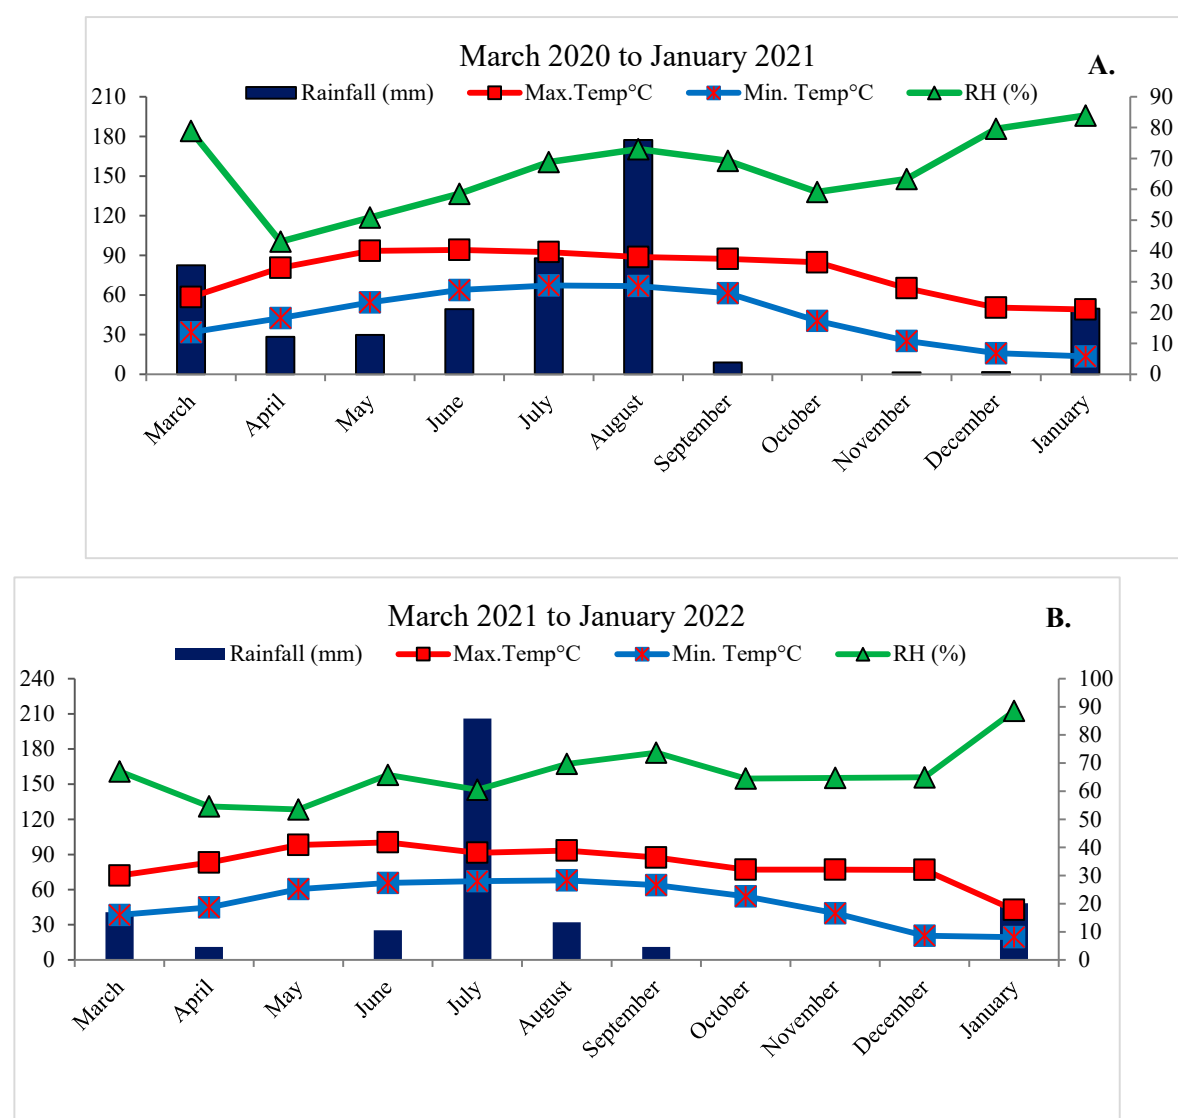

**Figure.** Weather data during the course of study of 2020-21 and 2021-22.
